# Supplementary material for: Chemical synthesis of the organoarsenical antibiotic arsinothricin
Source: Royal Society of Chemistry journal article supplement (doi:10.1039/d1ra06770b), 2021-01-01
Supplement: d1ra06770b1.pdf [file d1ra06770b1.pdf]

## Chemical Synthesis of the Organoarsenical Antibiotic Arsinothricin

A. Hasan Howlader,<sup>1,¶</sup> Sazzad H. Suzol,<sup>1,†</sup> Venkadesh Sarkarai Nadar,<sup>2</sup> Adriana Emilce Galván,<sup>2</sup> Aleksandra Nedovic,<sup>3</sup> Predrag Cudic,<sup>3</sup> Barry P. Rosen,<sup>2</sup> Masafumi Yoshinaga,<sup>2,\*</sup> and Stanislaw F. Wnuk<sup>1,\*</sup>

<sup>1</sup>*Department of Chemistry and Biochemistry, Florida International University, Miami, Florida 33199, United States*

<sup>2</sup>*Department of Cellular Biology and Pharmacology, Herbert Wertheim College of Medicine, Florida International University, Miami, Florida 33199, United States*

<sup>3</sup>*Department of Chemistry and Biochemistry, Charles E. Schmidt College of Science, Florida Atlantic University, Boca Raton, Florida 33431, United States*

## SUPPORTING INFORMATION

- |                                                                                   |        |
|-----------------------------------------------------------------------------------|--------|
| 1. RP-HPLC traces after derivatization of AST with Marfey's reagent (Figure S1)   | S2     |
| 2. Copies of <sup>1</sup> H, <sup>13</sup> C NMR and HRMS spectra (Figure S2-S17) | S3-S18 |

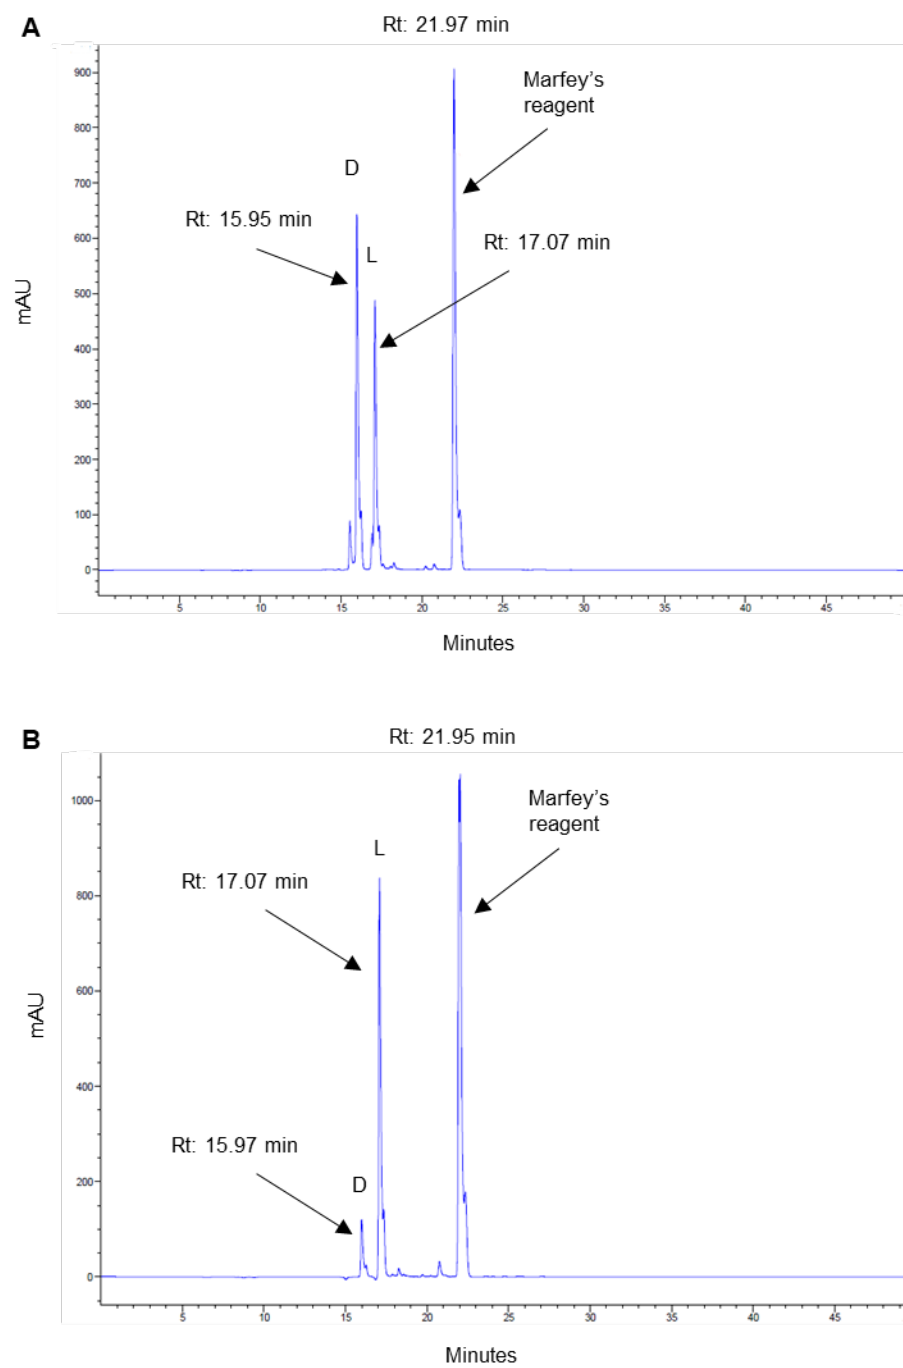

Figure S1. RP-HPLC traces after derivatization with Marfey's reagent: **A**, D/L-AST; **B**, L-AST

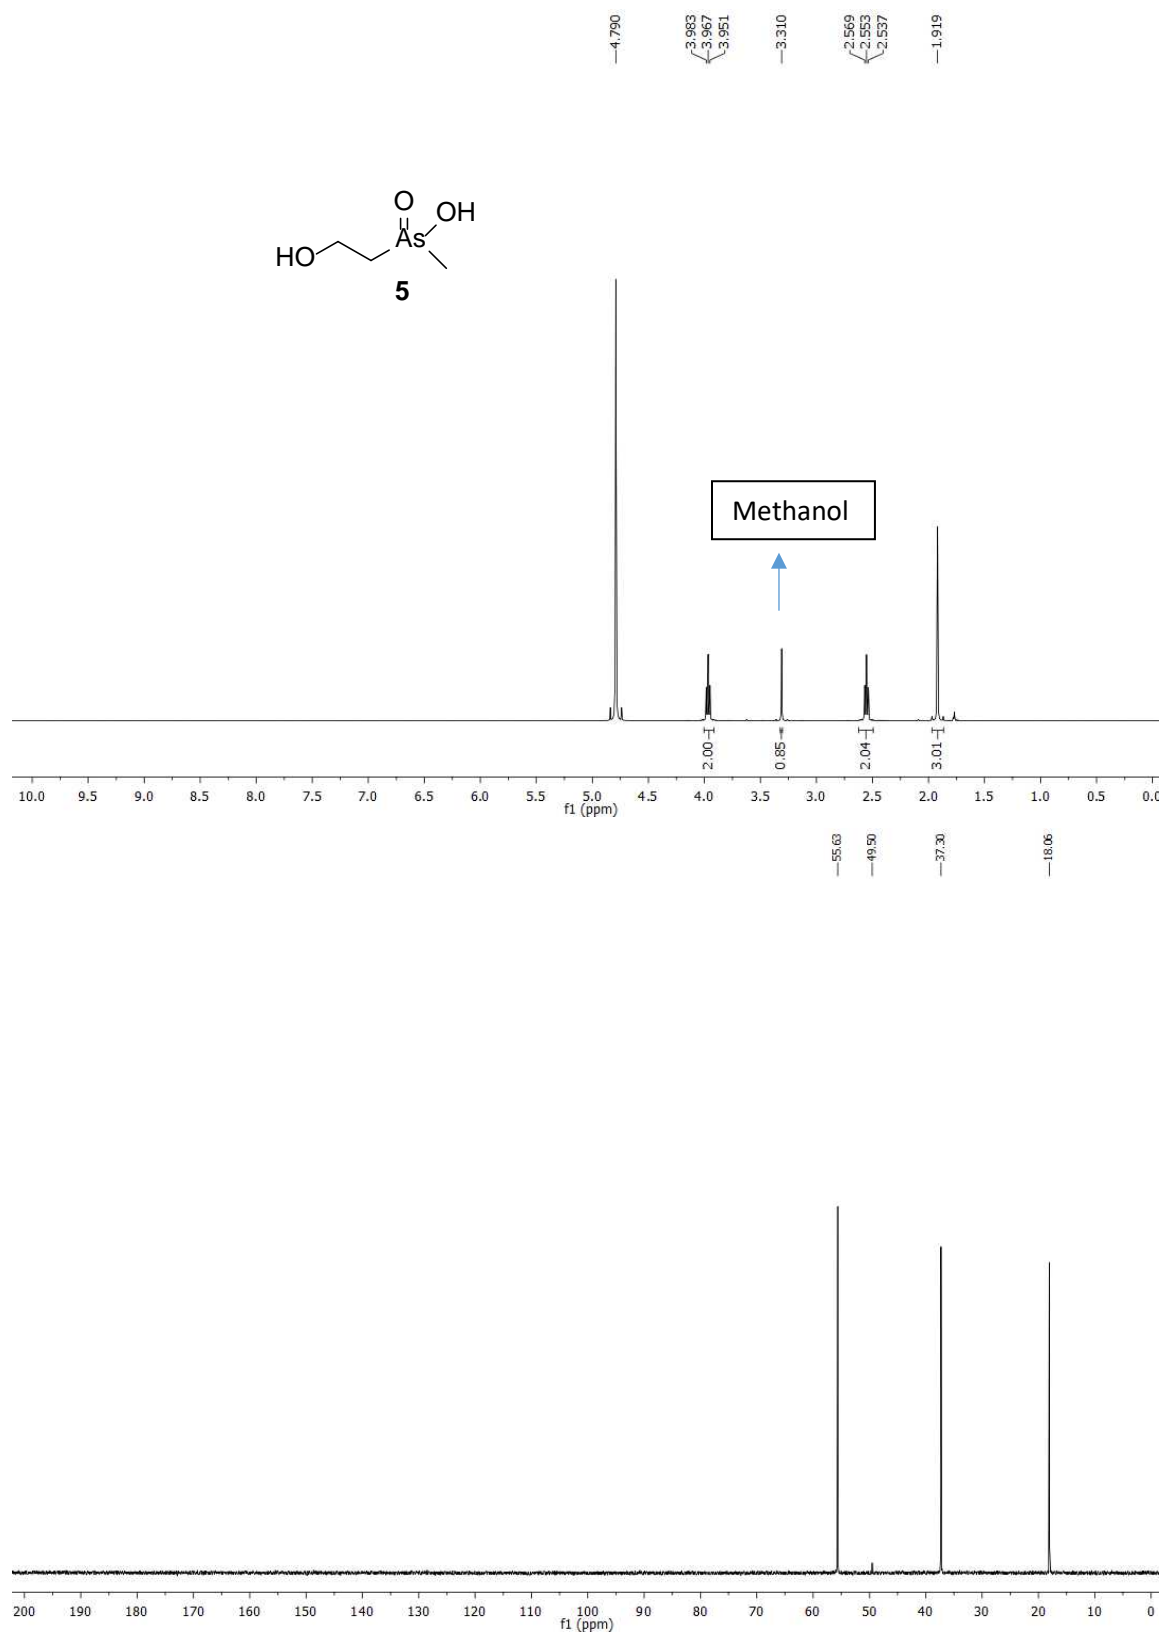

Figure S2. <sup>1</sup>H NMR and <sup>13</sup>C NMR spectra of compound **5** in D<sub>2</sub>O.

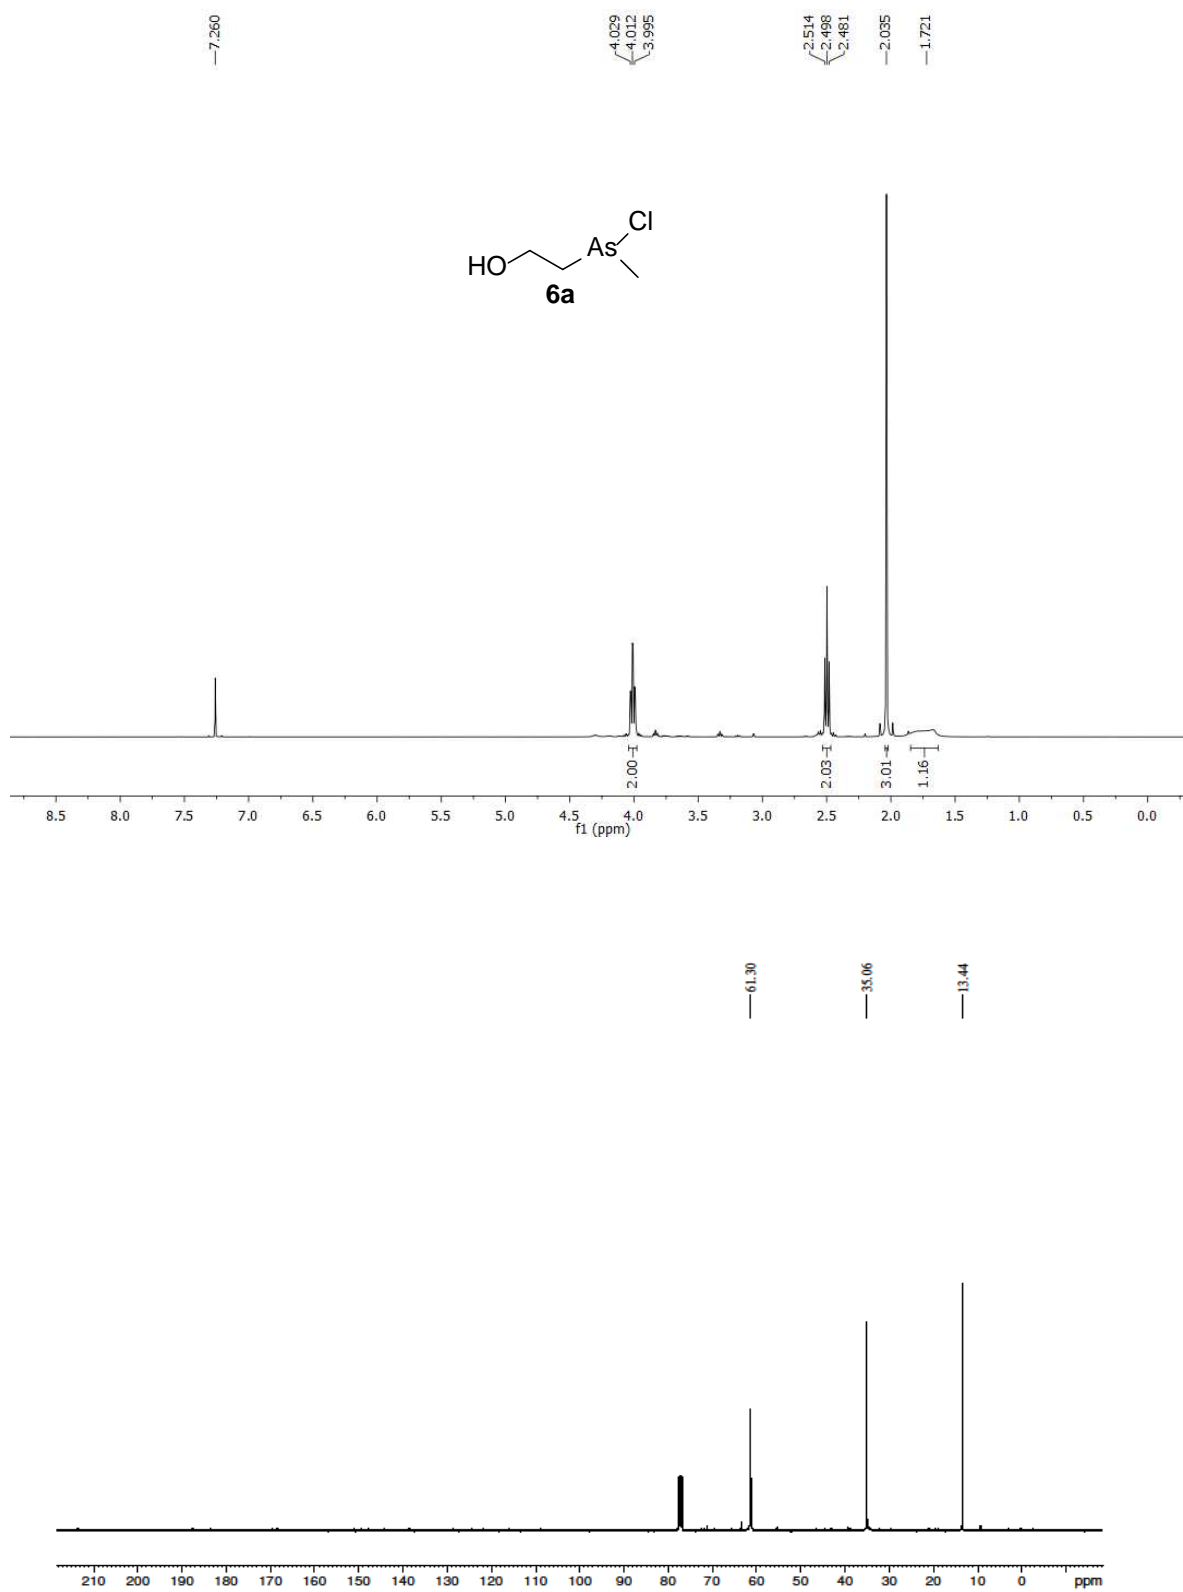

Figure S3. <sup>1</sup>H NMR and <sup>13</sup>C NMR spectra of compound **6a** in CDCl<sub>3</sub>.

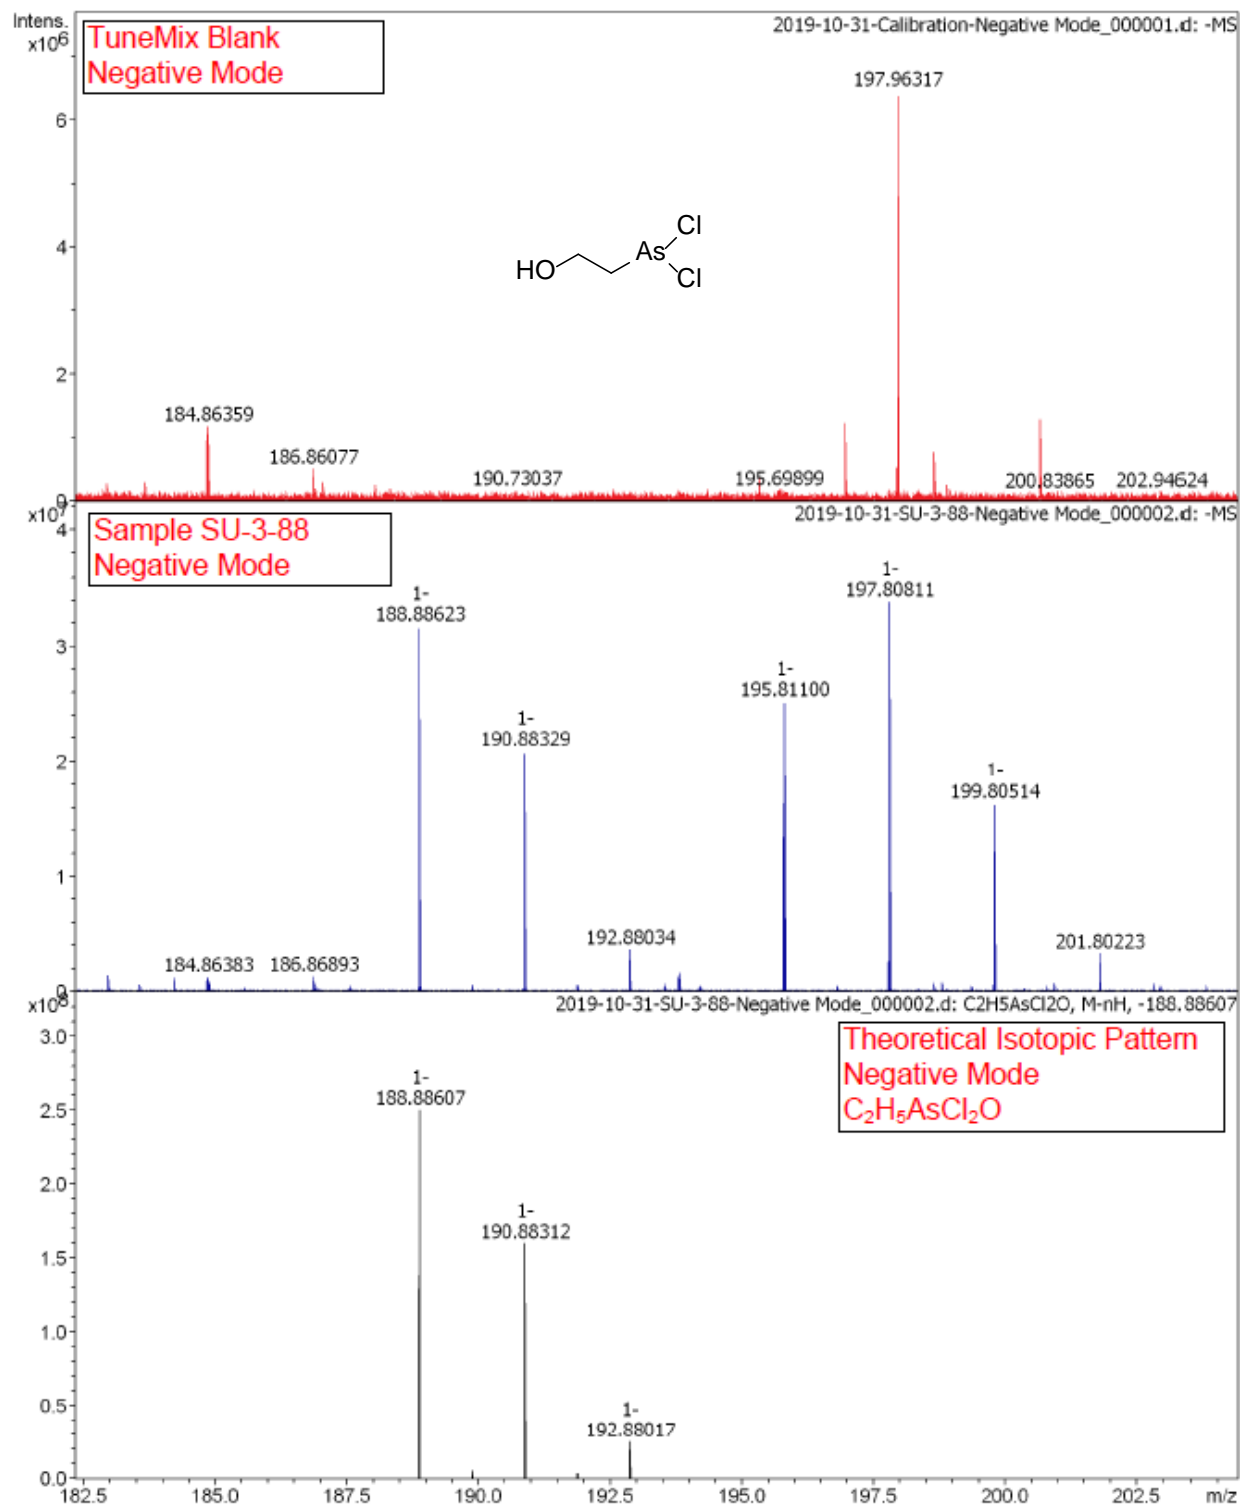

Figure S4. HRMS spectrum of dichloro(2-hydroxyethyl)arsine.

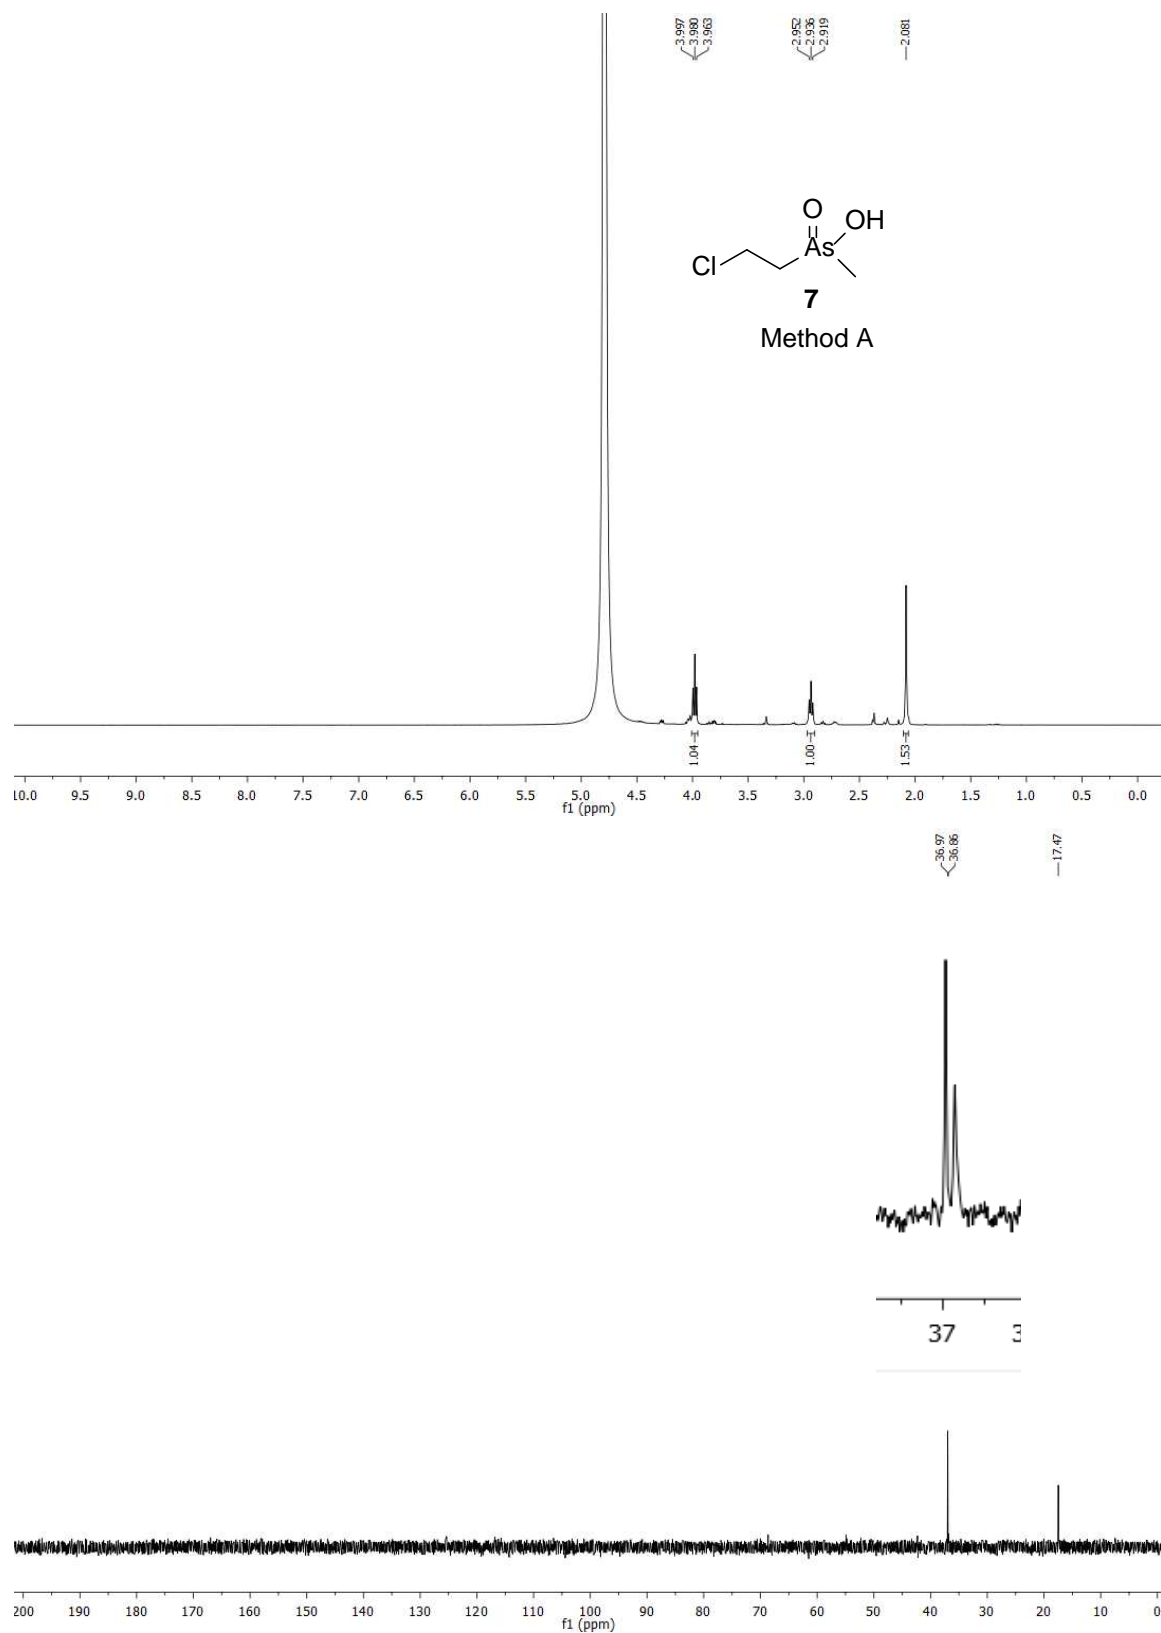

Figure S5. <sup>1</sup>H NMR and <sup>13</sup>C NMR spectra of compound **7** from method A in D<sub>2</sub>O.

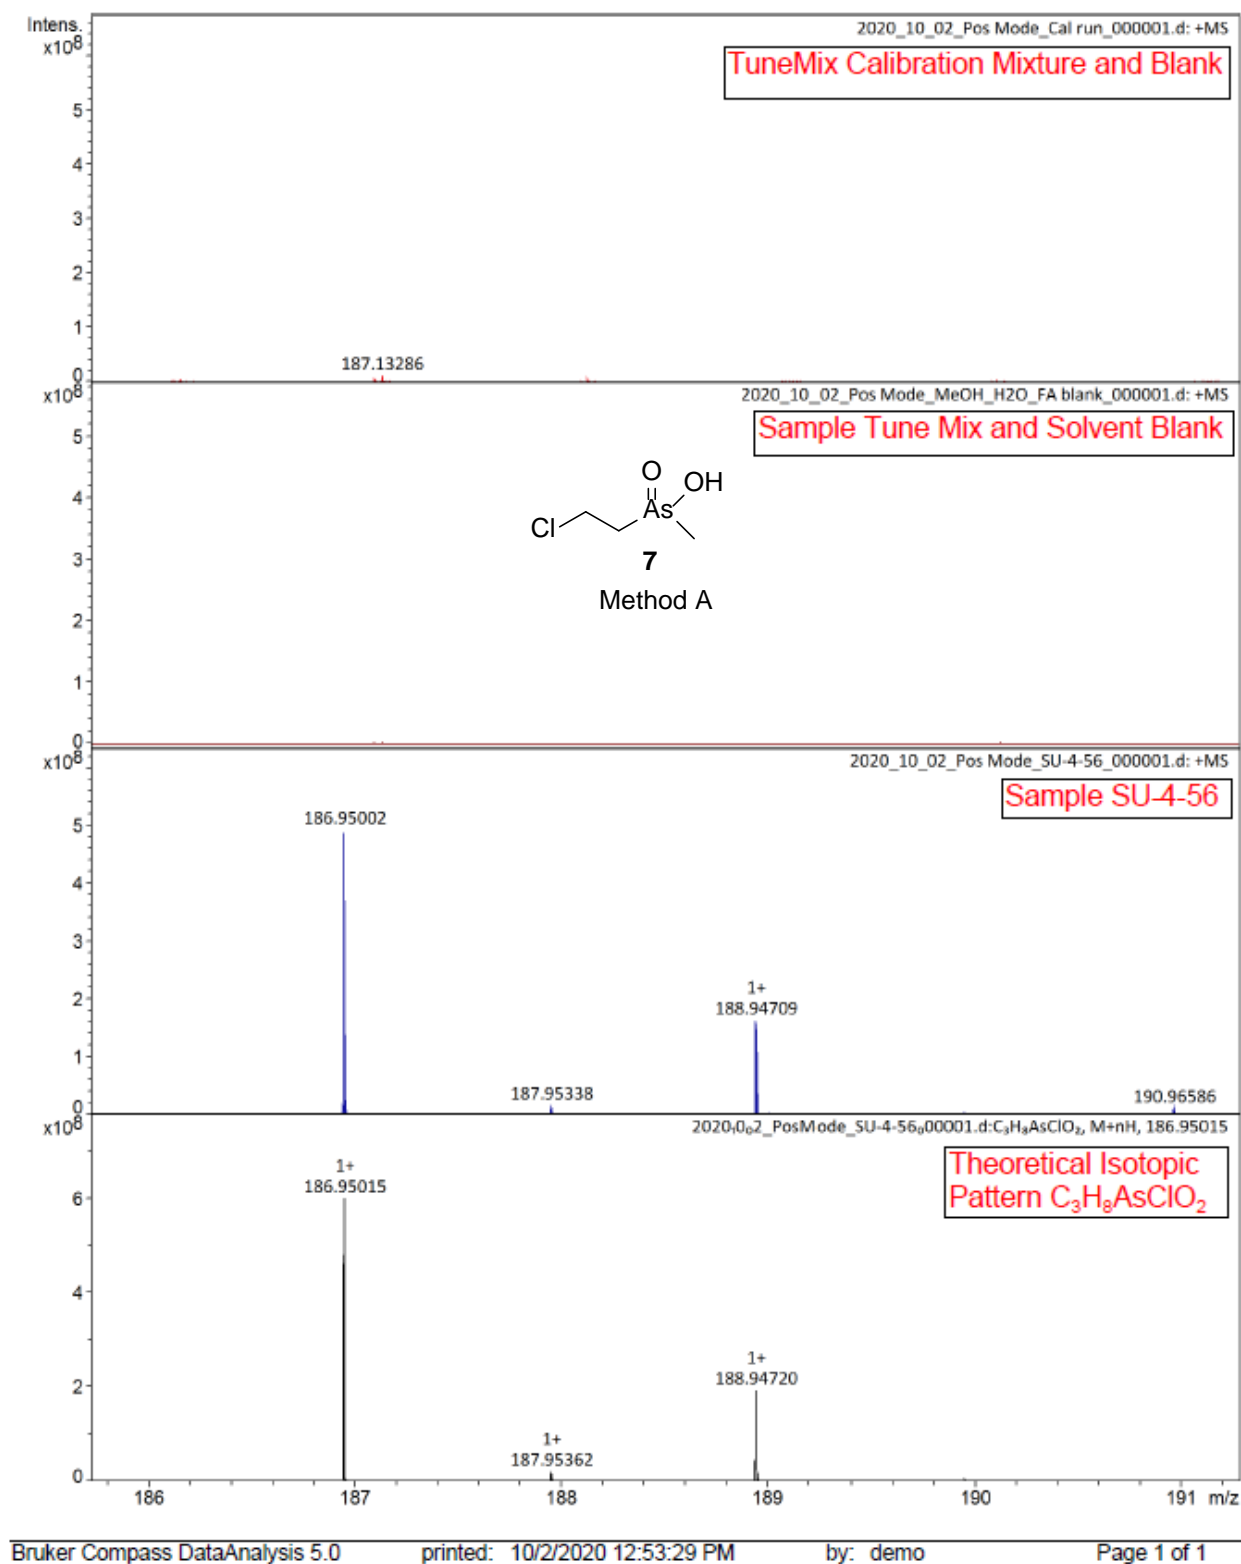

Figure S6. HRMS spectrum of compound 7.

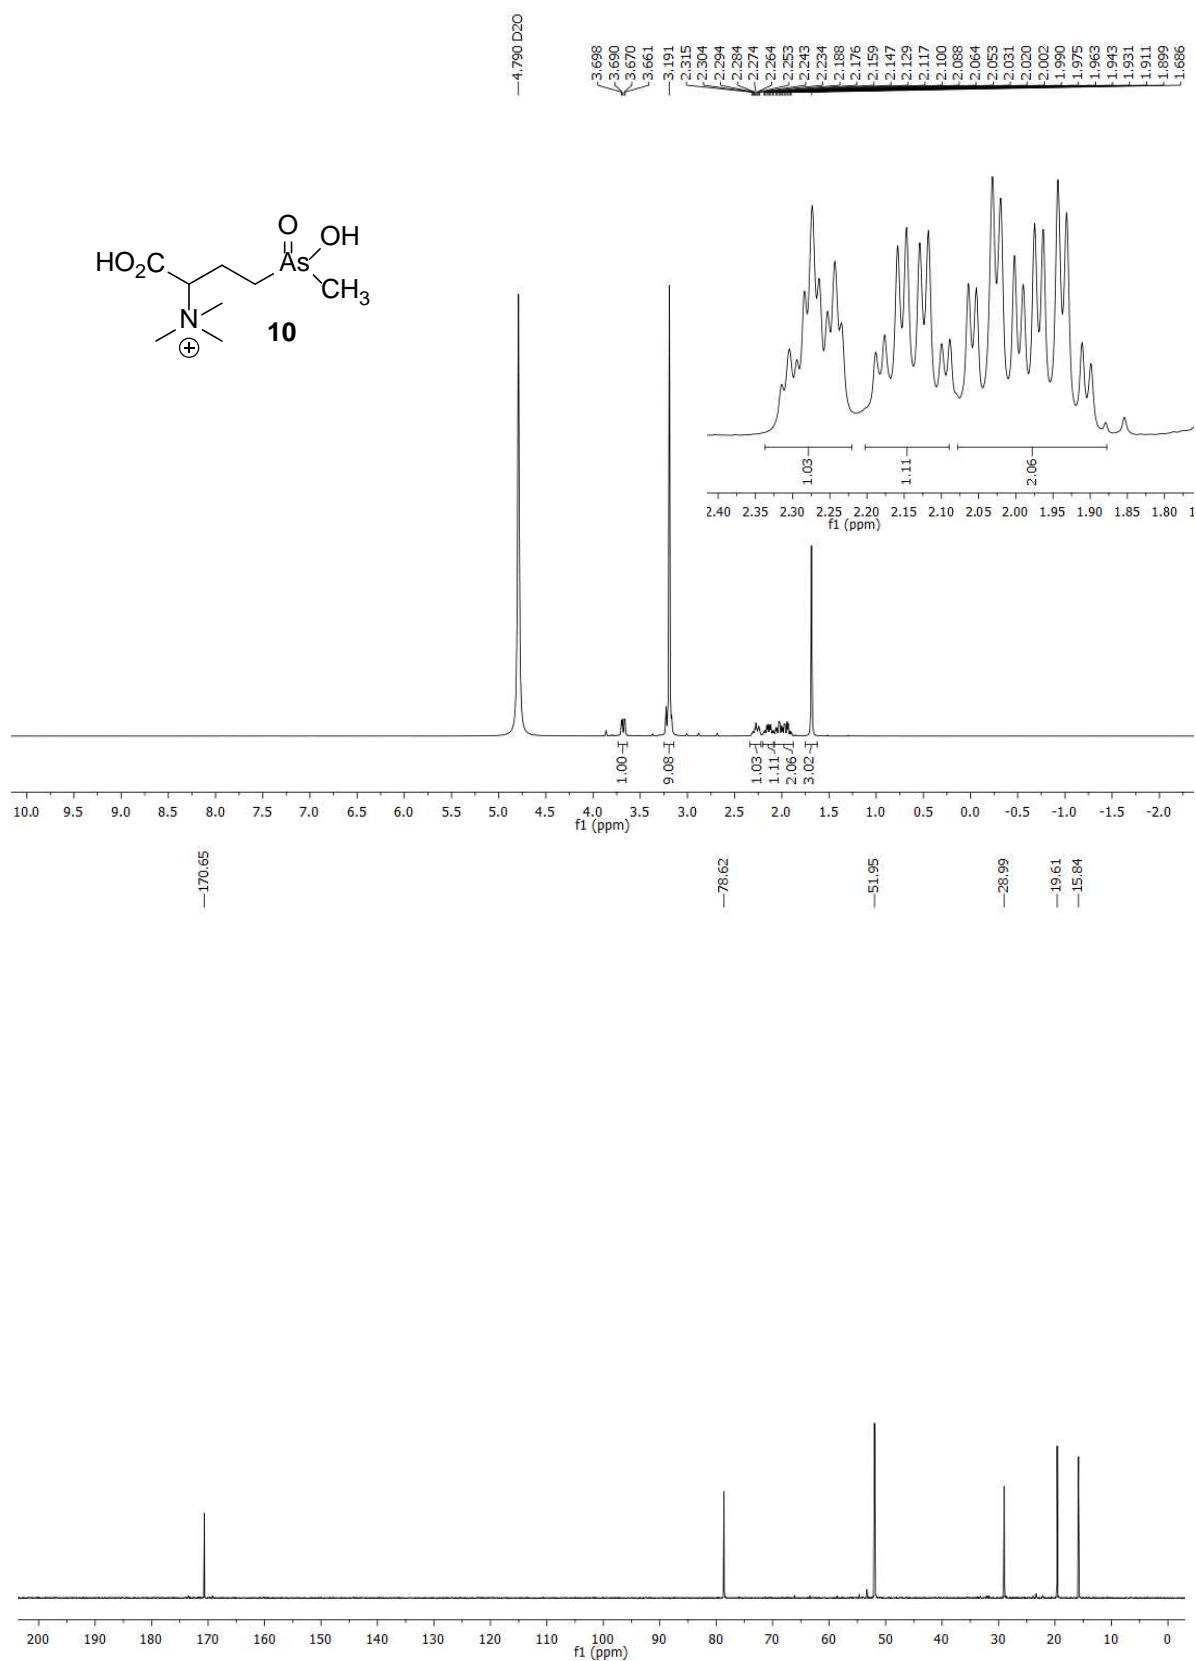

Figure S7. <sup>1</sup>H NMR and <sup>13</sup>C NMR spectra of compound **10** in D<sub>2</sub>O.



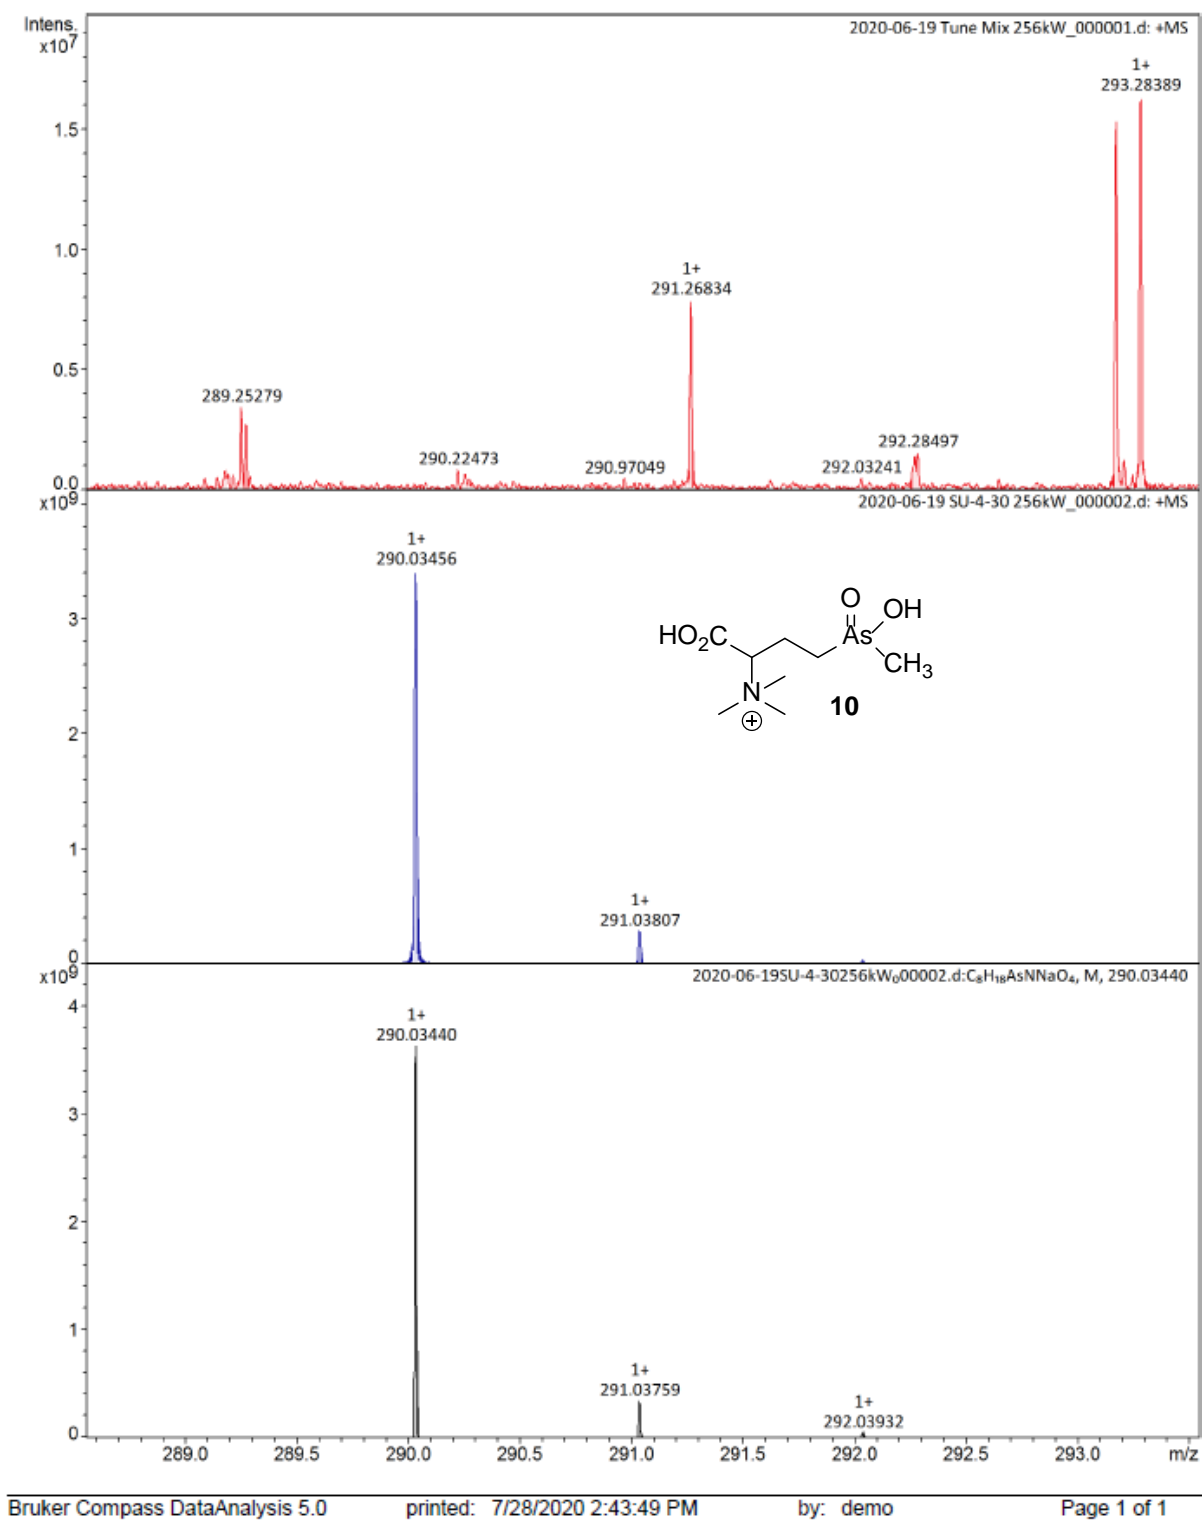

Figure S8. HRMS spectrum of compound **10**.

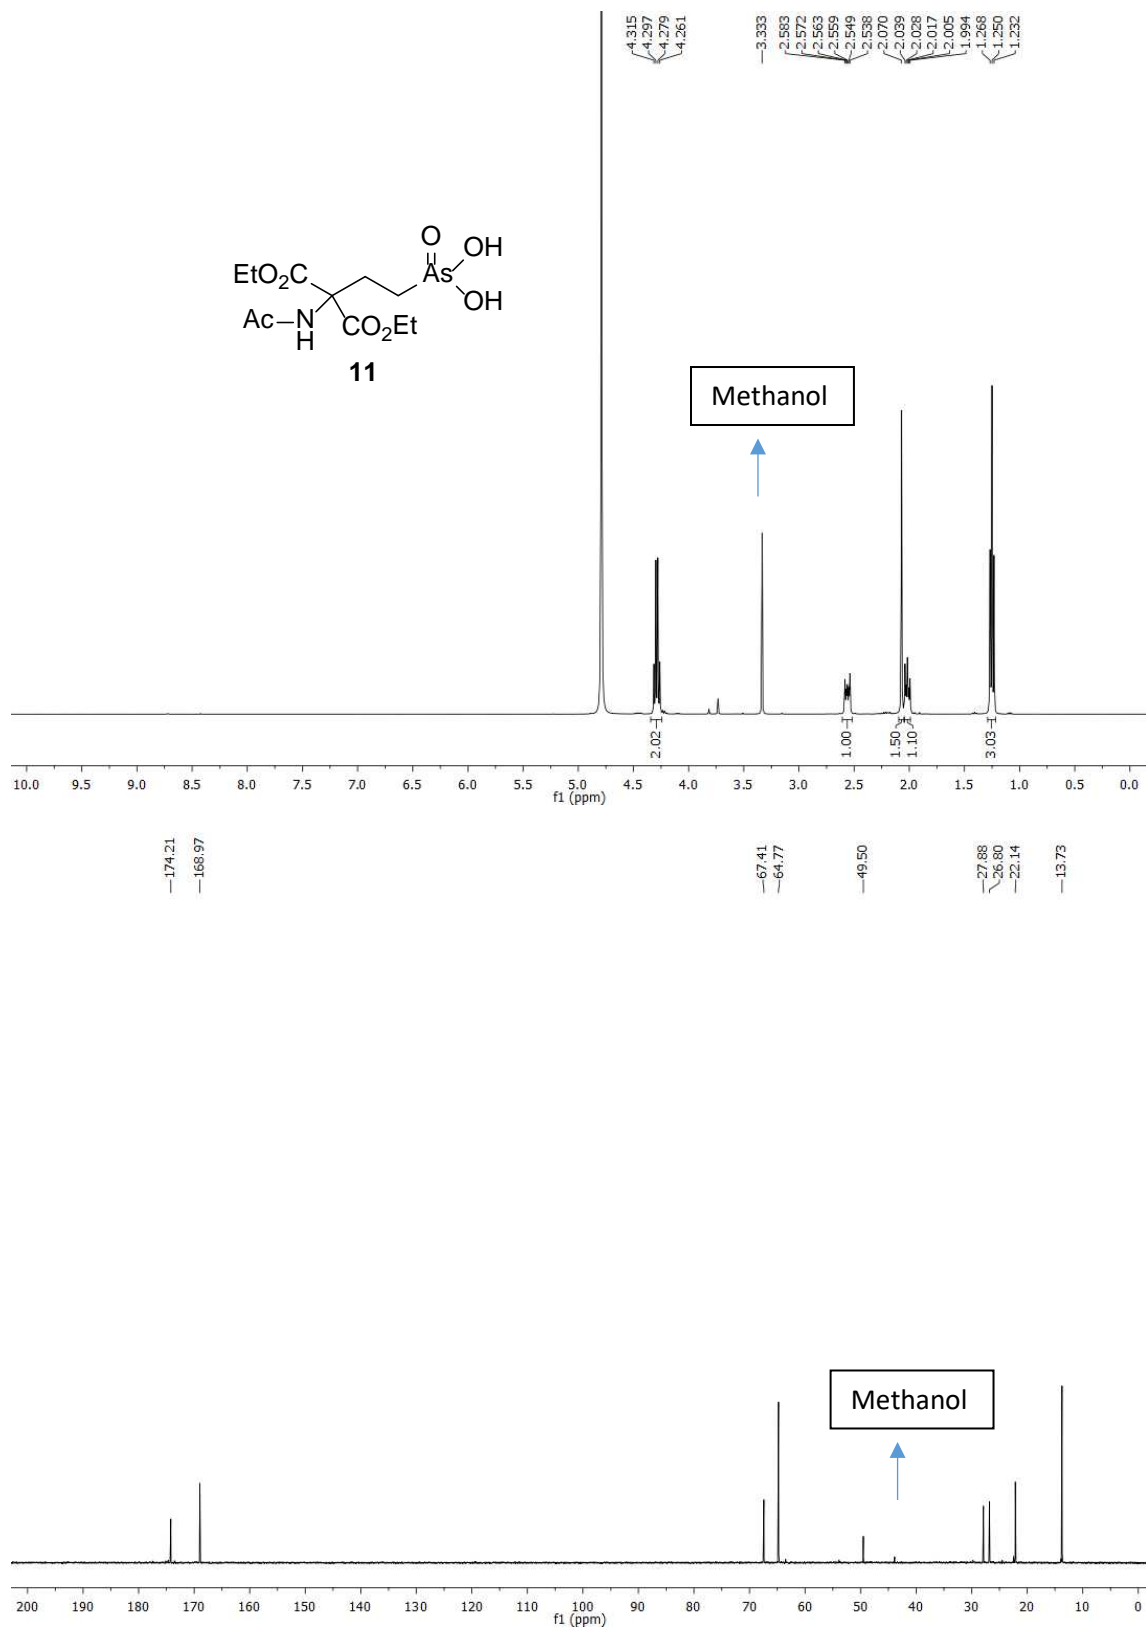

Figure S9.  $^1\text{H}$  NMR and  $^{13}\text{C}$  NMR spectra of compound **11** in  $\text{D}_2\text{O}$ .

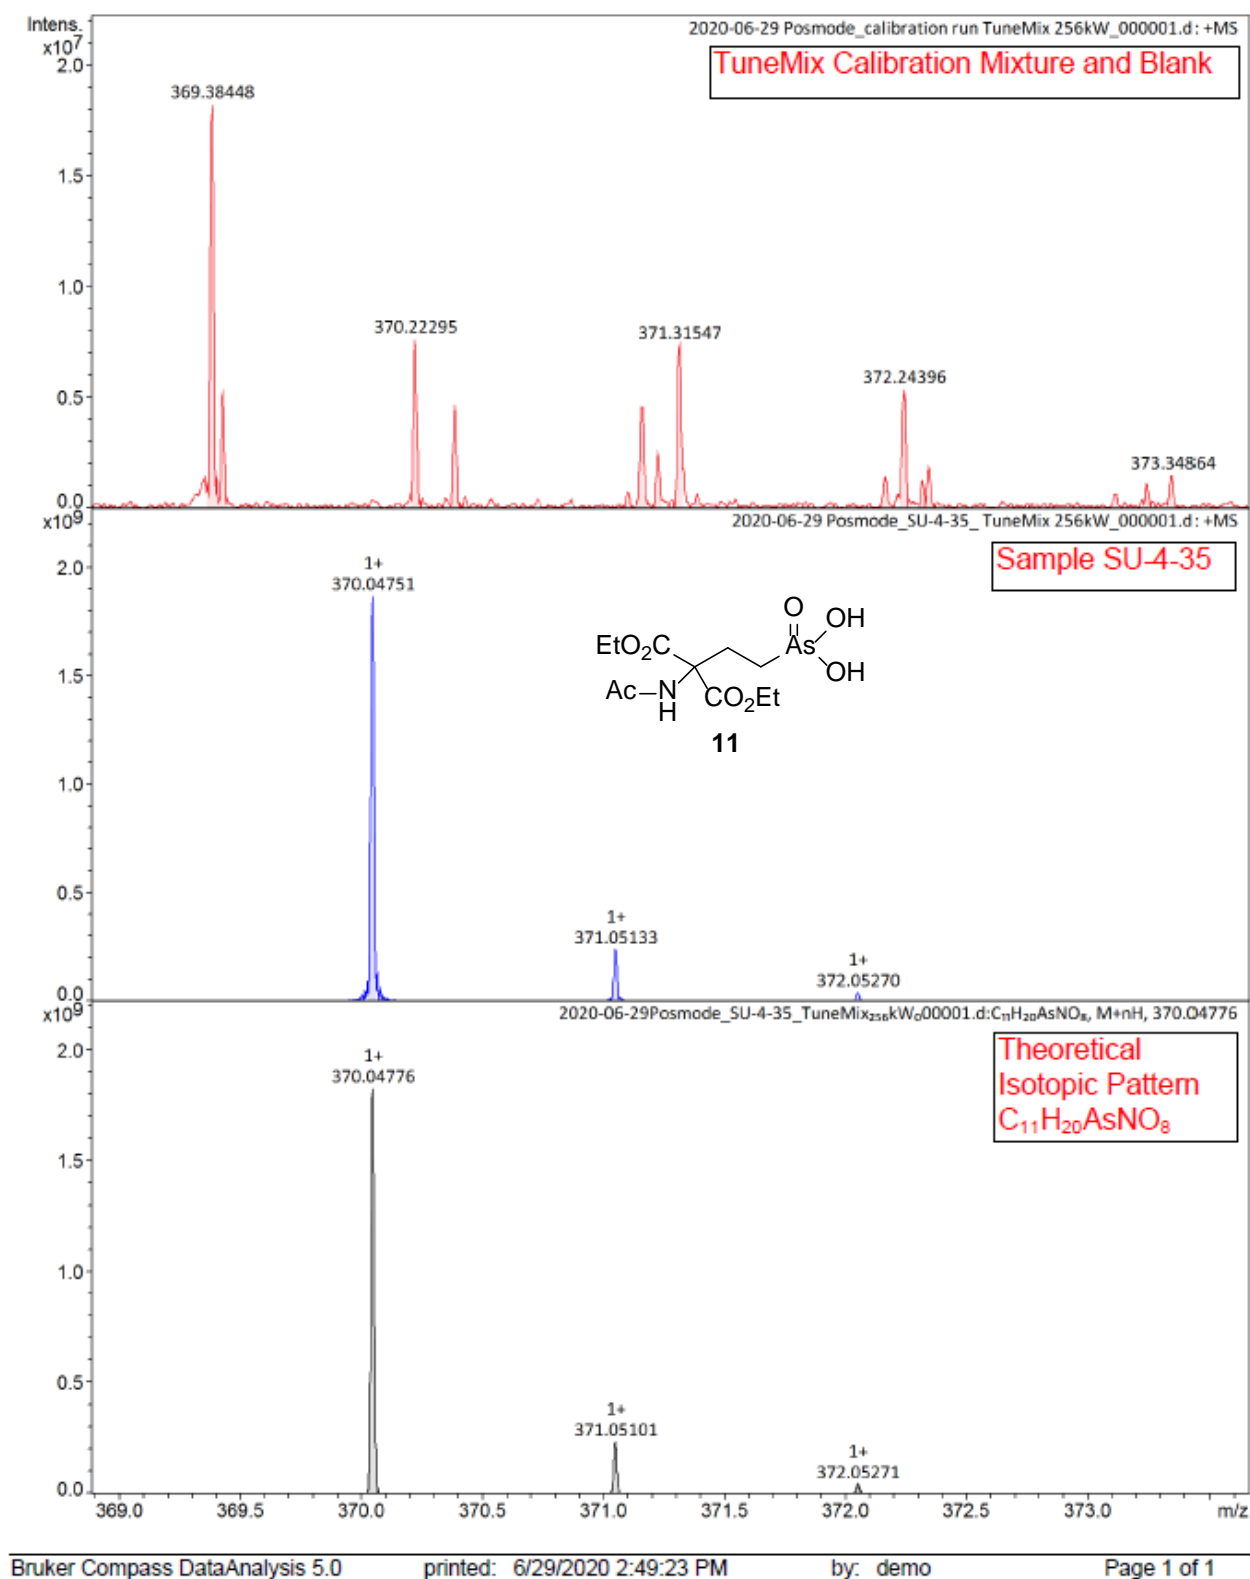

Figure S10. HRMS spectrum of compound **11**.

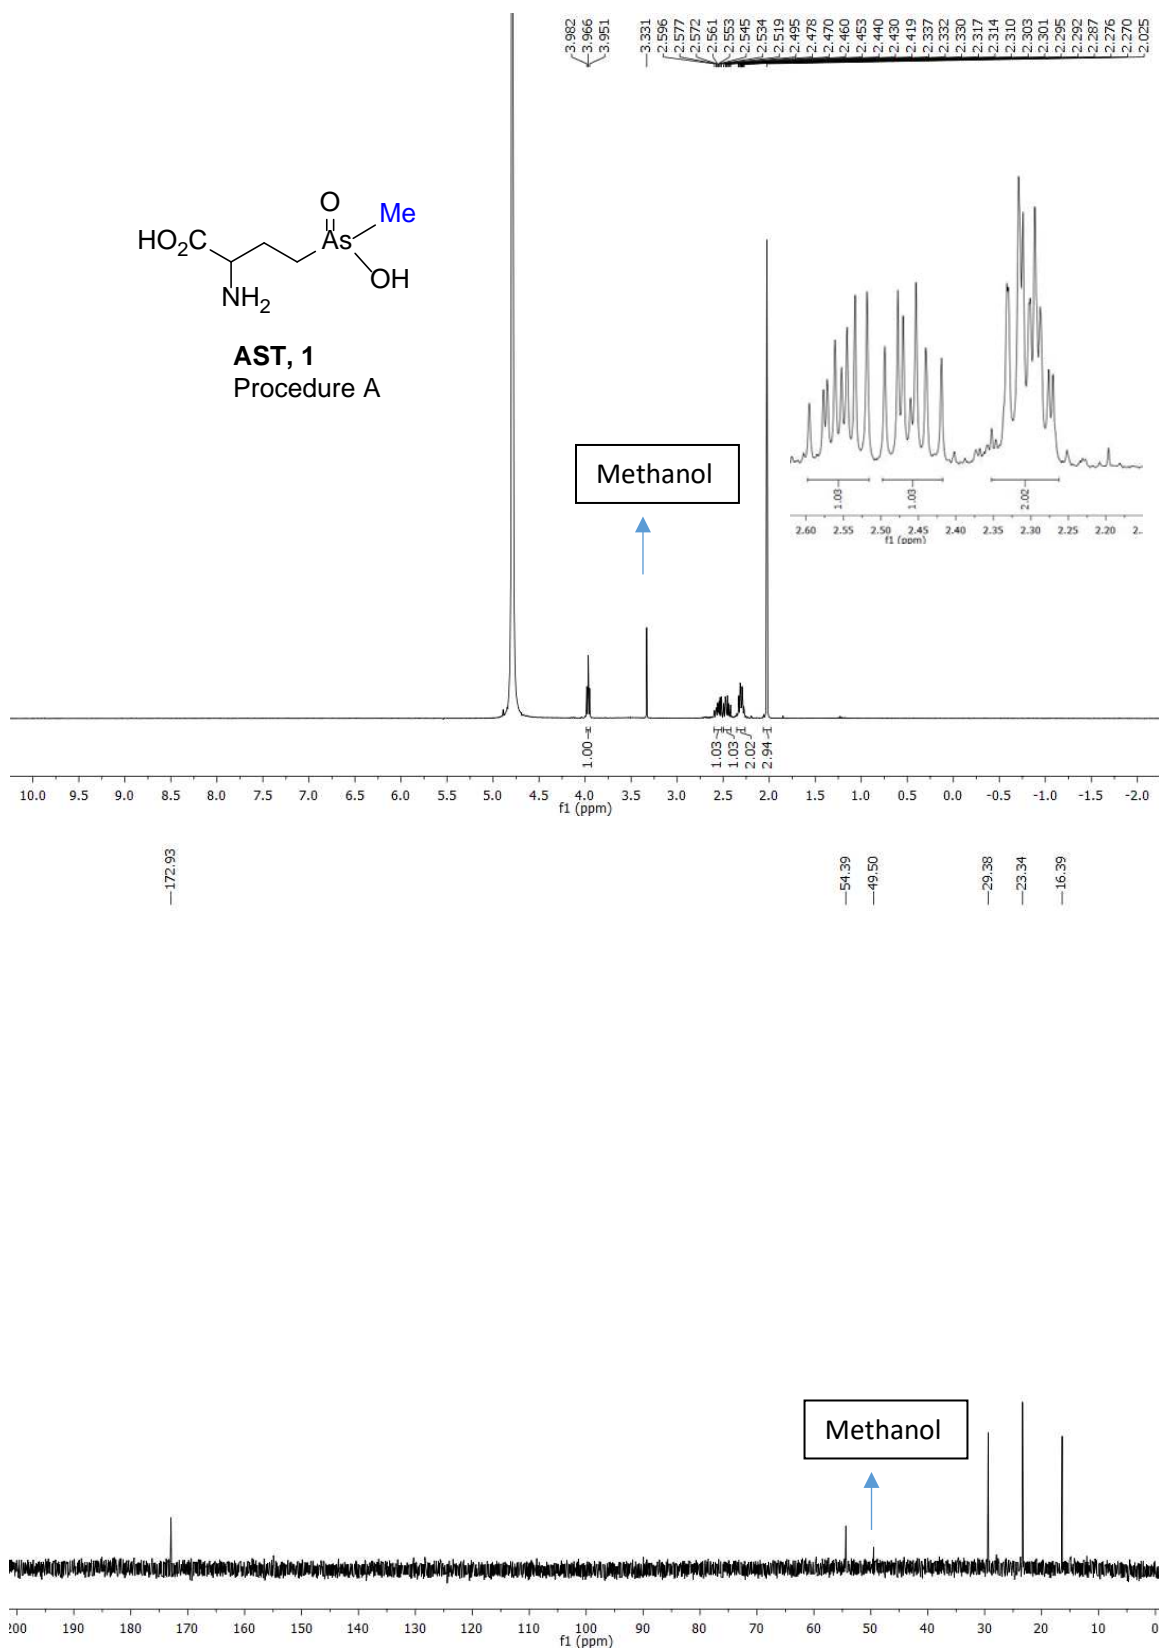

Figure S11. <sup>1</sup>H NMR and <sup>13</sup>C NMR spectra of compound **1** from procedure A in D<sub>2</sub>O.





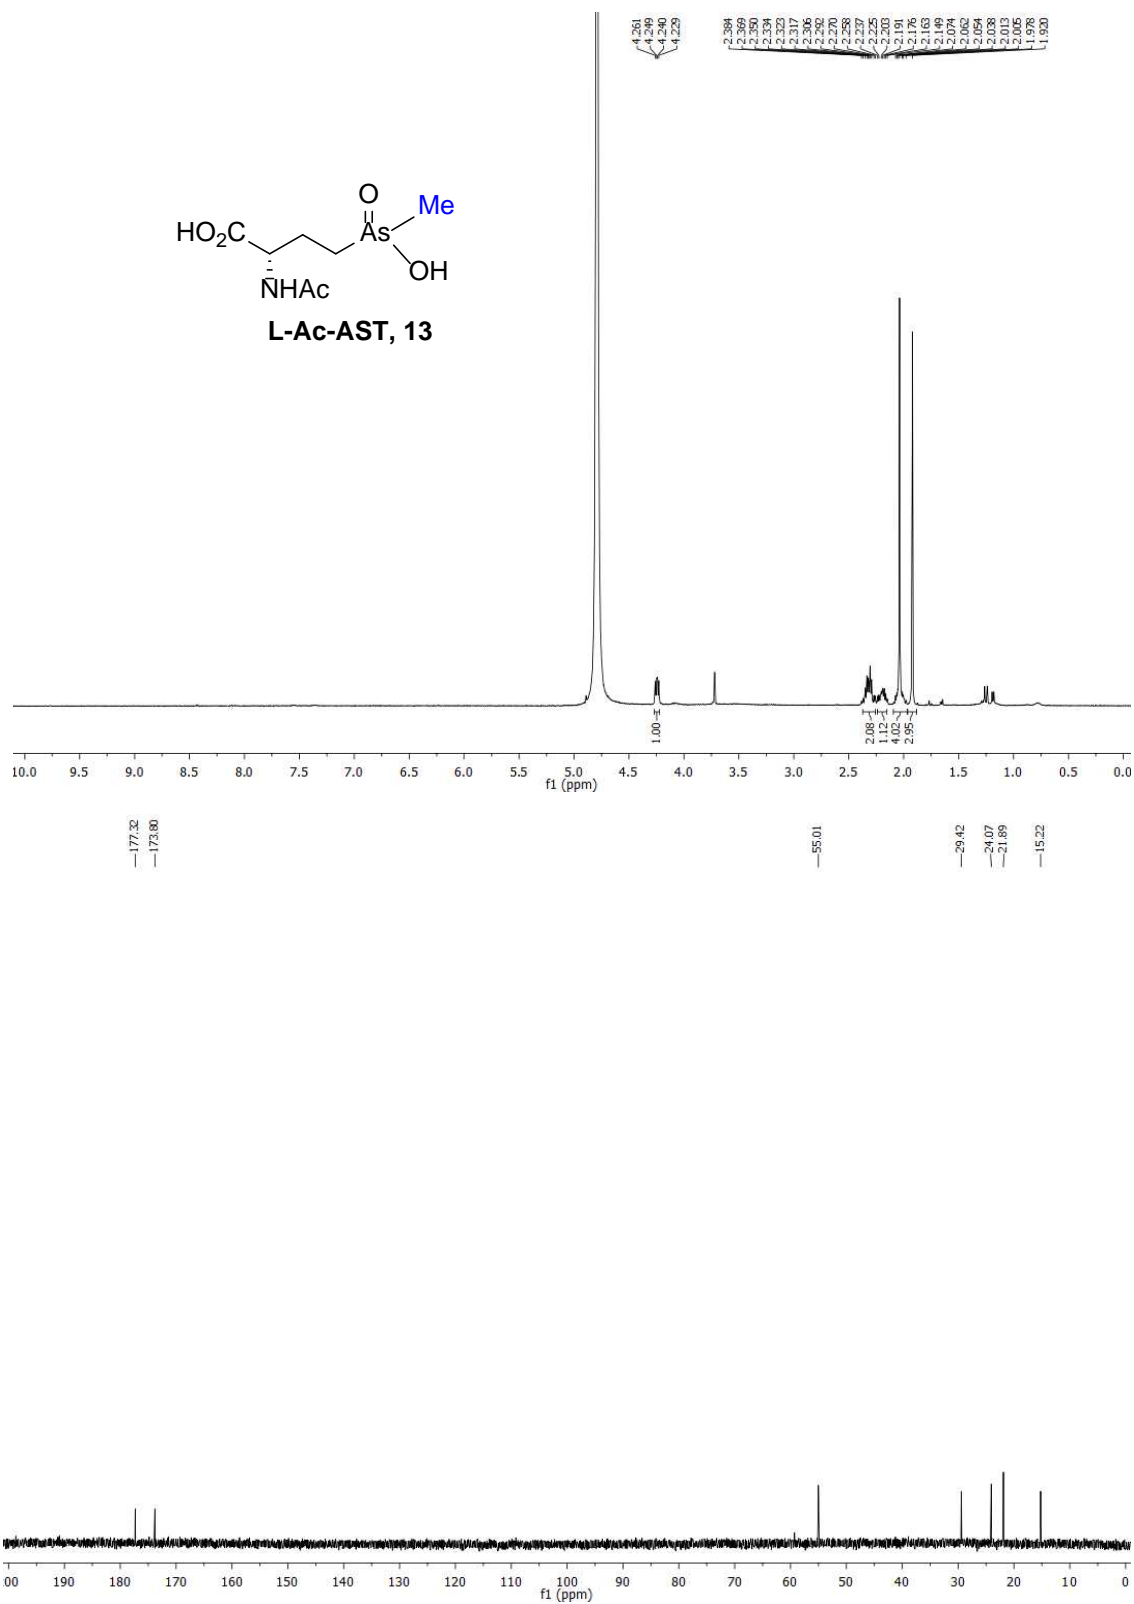

Figure S14. <sup>1</sup>H NMR and <sup>13</sup>C NMR spectra of compound **13** in D<sub>2</sub>O.

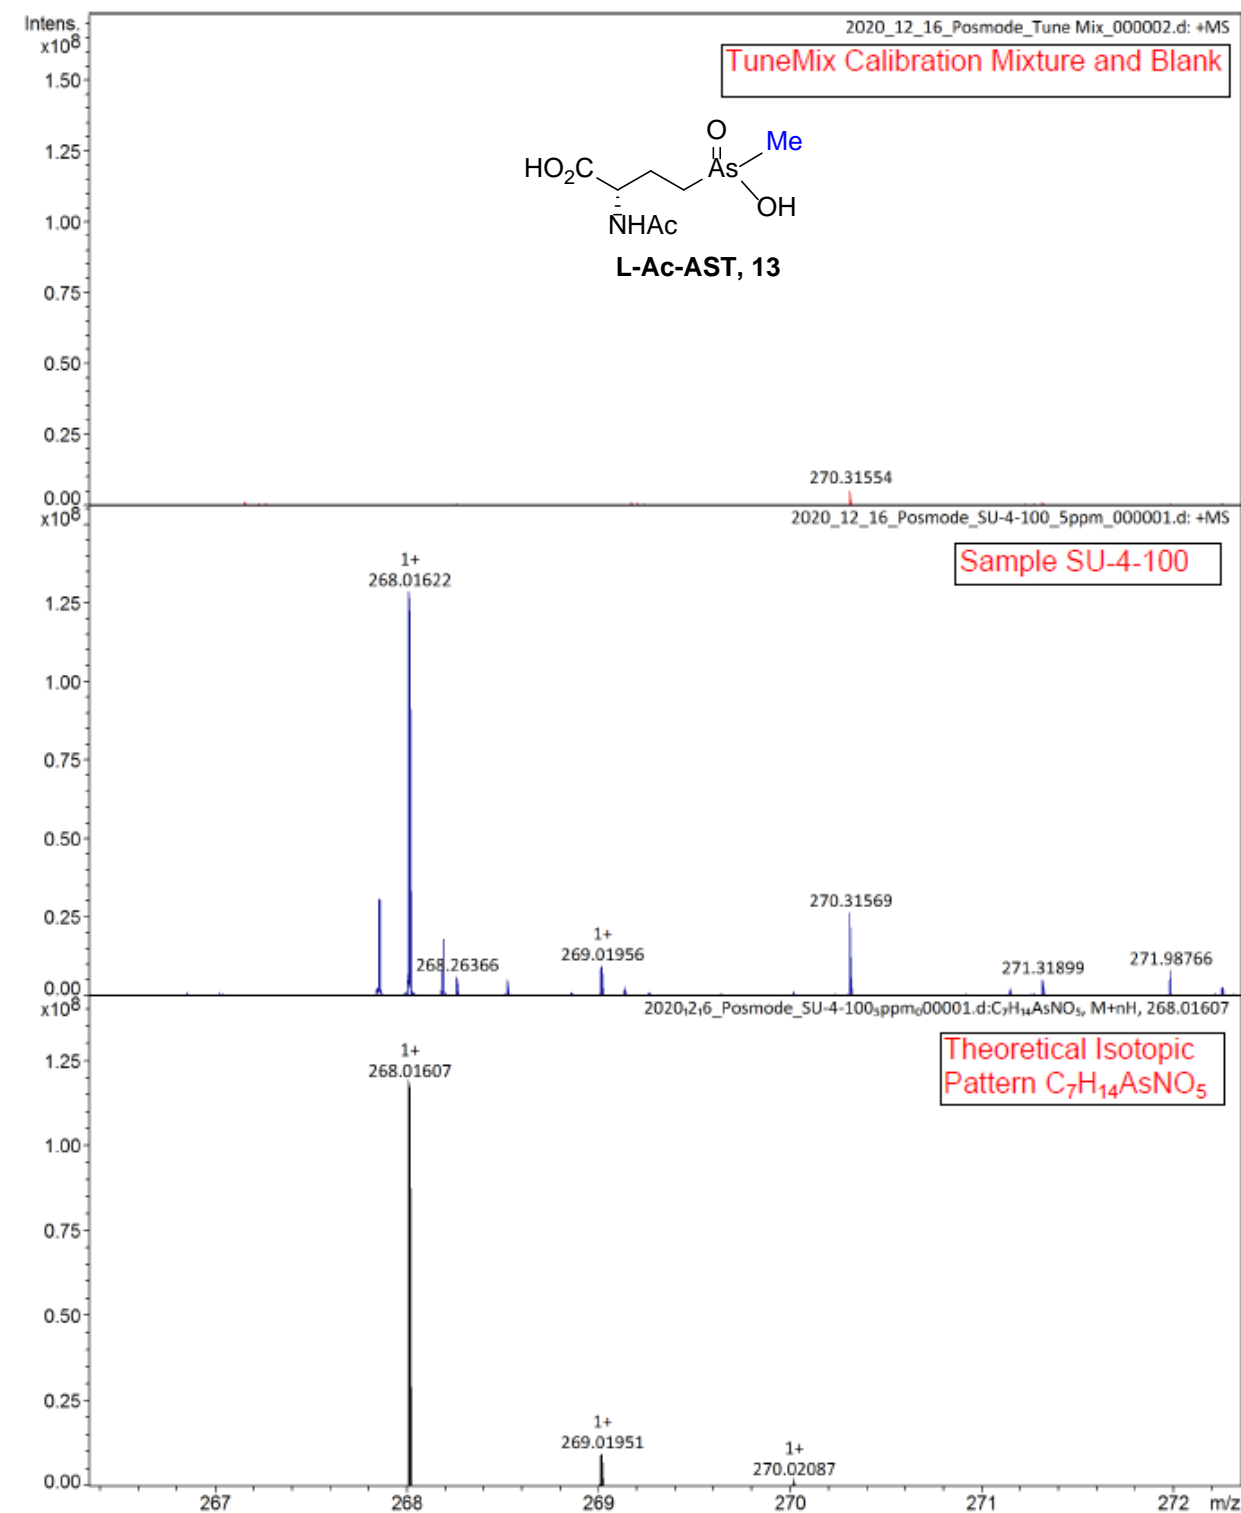

Figure S15. HRMS spectrum of compound **13**.



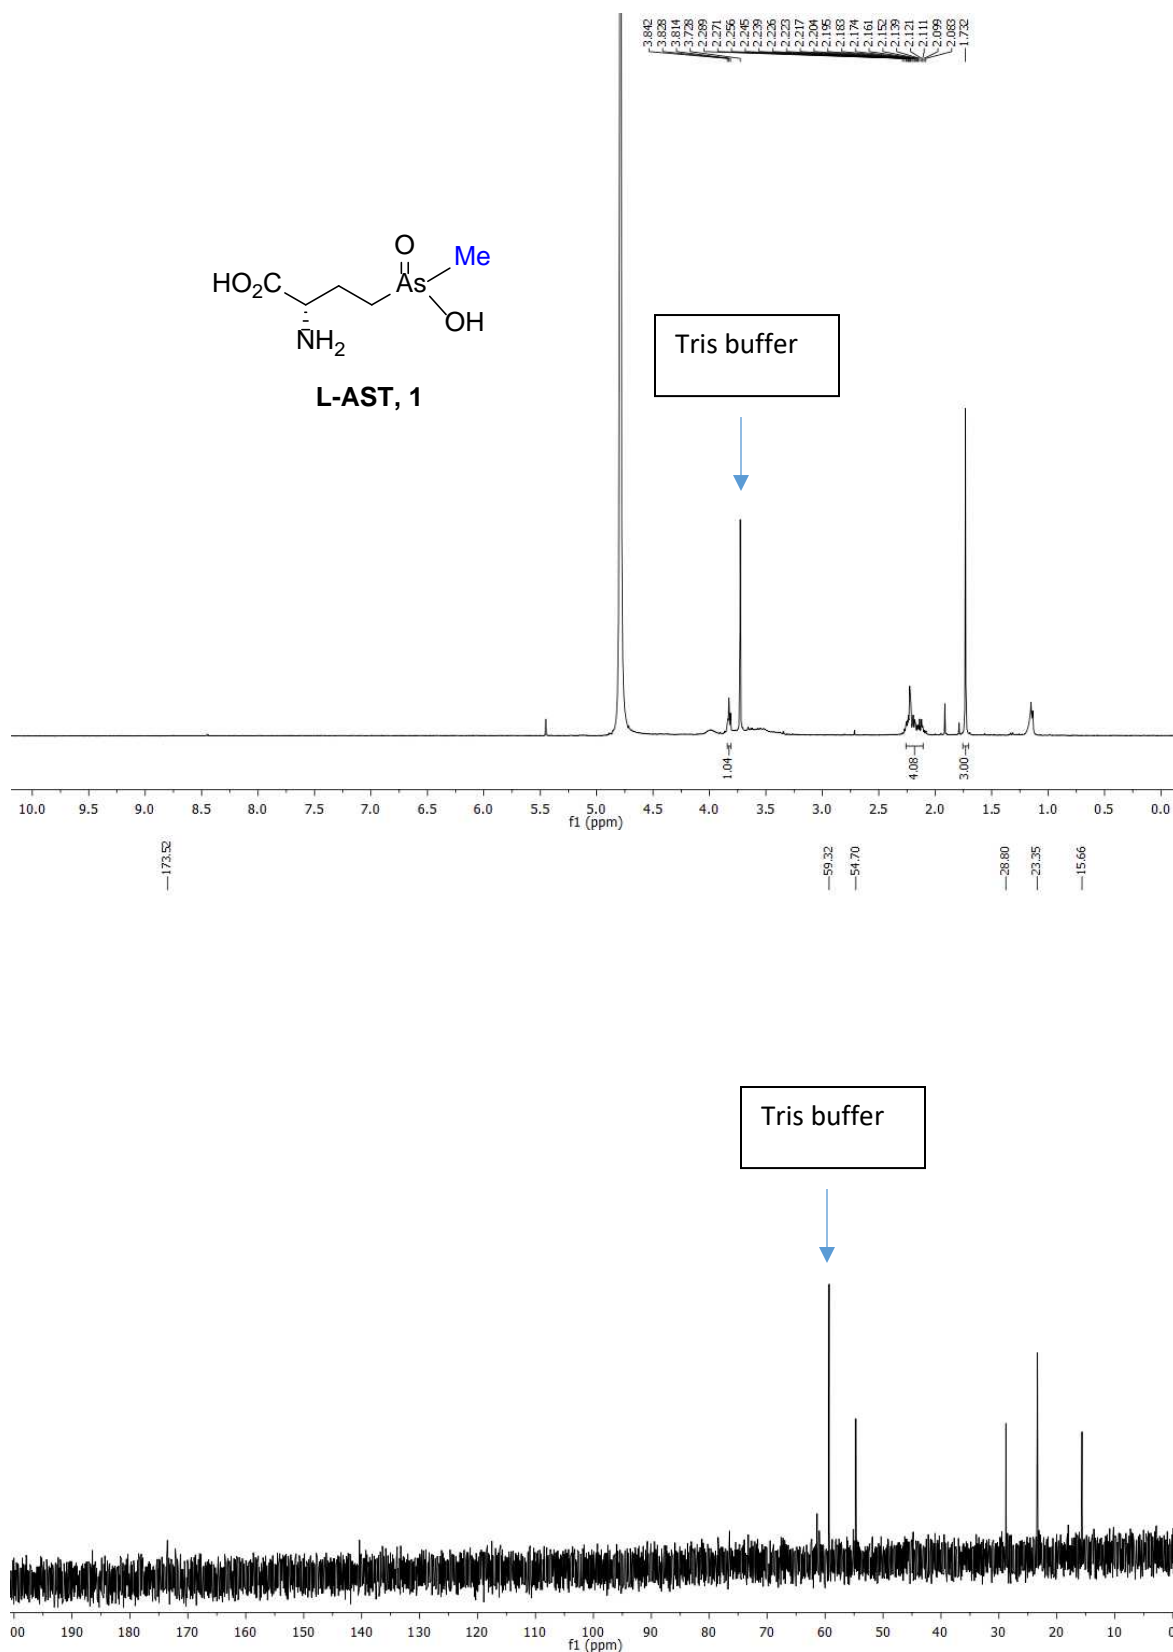

Figure S16. <sup>1</sup>H NMR and <sup>13</sup>C NMR spectra of L-AST in D<sub>2</sub>O.

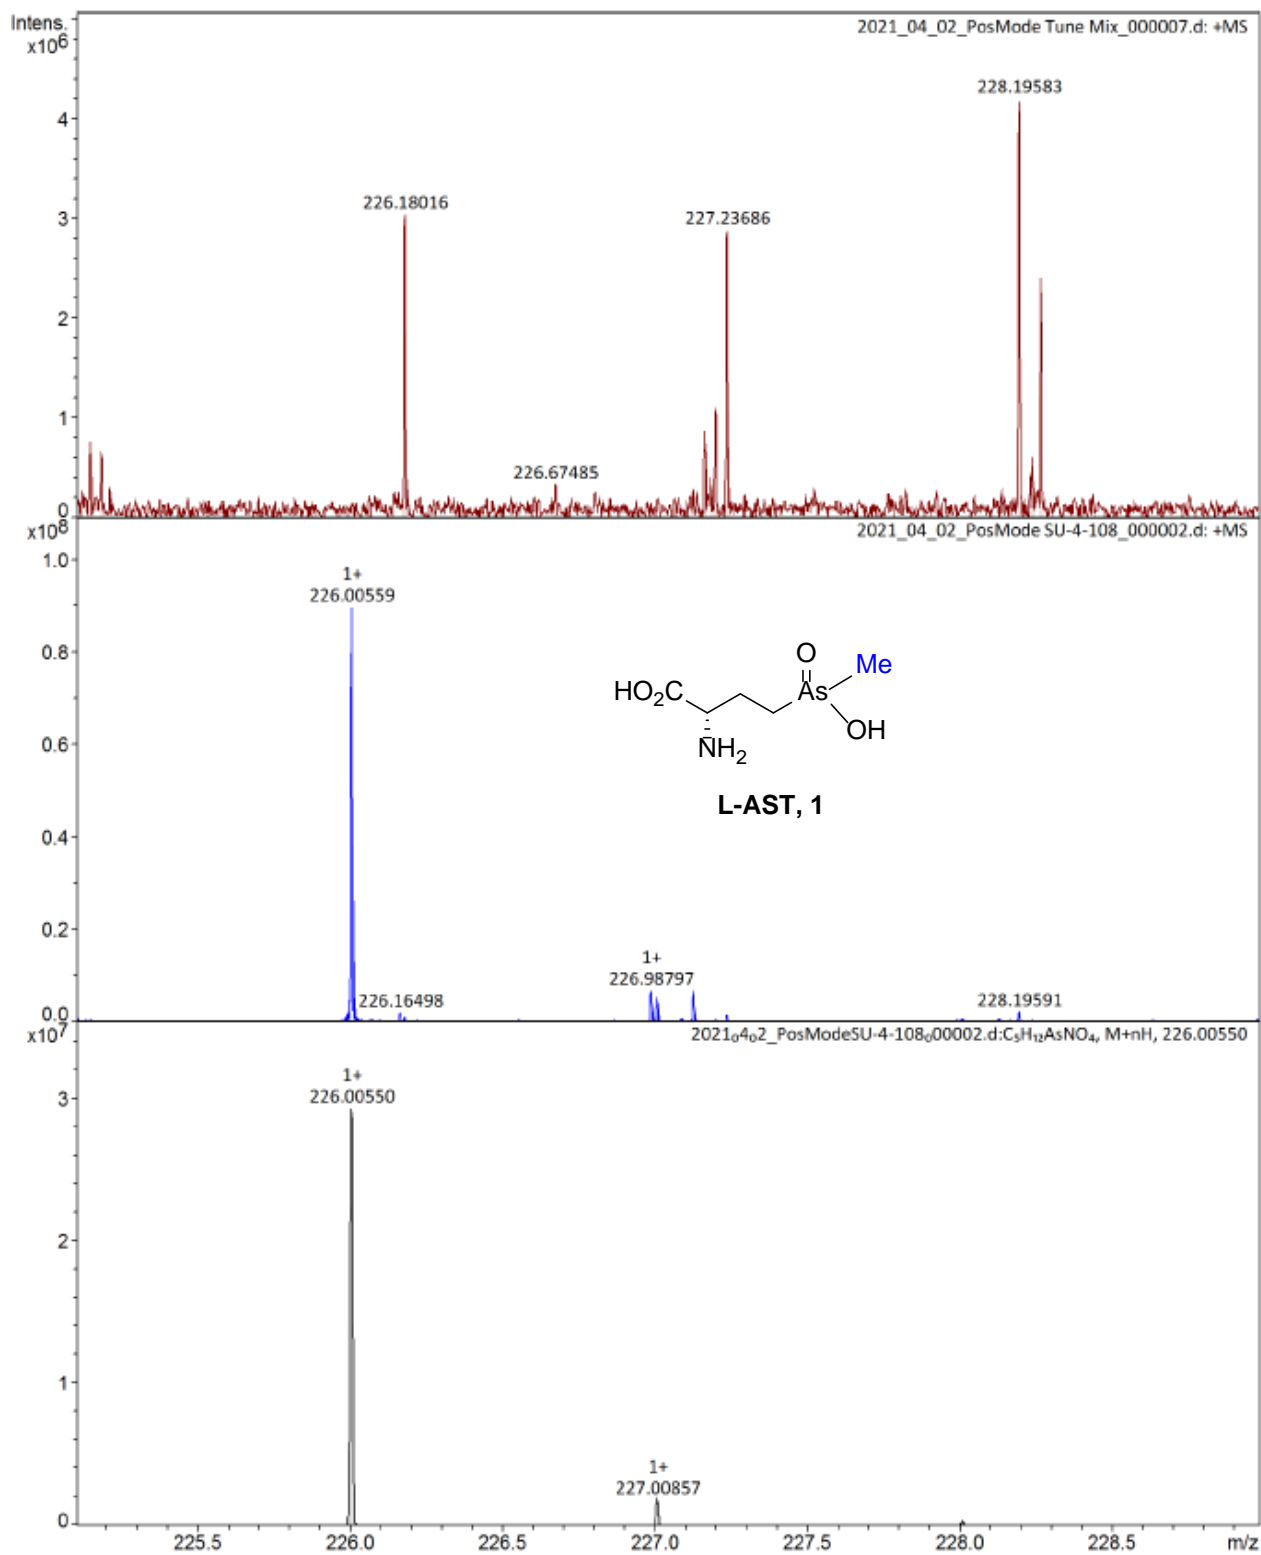

Figure S17. HRMS spectrum of L-AST
